# Supplementary material for: Defining Persistent Hotspots: Areas That Fail to Decrease Meaningfully in Prevalence after Multiple Years of Mass Drug Administration with Praziquantel for Control of Schistosomiasis
Source: PubMed Central journal article supplement (PMC5805060; doi:10.4269/ajtmh.17-0368), 2017-09-25
Supplement: tpmd170368.SD1.pdf [file tpmd170368.SD1.pdf]

SUPPLEMENTAL TABLE 1

Correlation between having attained adequate coverage and meeting criteria for adequate response (nonhotspot), as defined by the absolute change in prevalence (approach 1);  $\chi^2 P = 0.096$

|                          |                    | Not adequate coverage (%) | Adequate coverage (%) | Total (%) |
|--------------------------|--------------------|---------------------------|-----------------------|-----------|
| Absolute change approach | Declining          | 19 (51)                   | 18 (49)               | 37 (100)  |
|                          | Persistent hotspot | 26 (70)                   | 11 (30)               | 37 (100)  |
|                          | Total              | 45 (61)                   | 29 (39)               | 74 (100)  |

SUPPLEMENTAL TABLE 2

Correlation between having attained adequate coverage and meeting criteria for adequate response (nonhotspot) as defined by the percent change in prevalence (approach 2);  $\chi^2 P = 0.172$

|                         |                    | Not adequate coverage (%) | Adequate coverage (%) | Total (%) |
|-------------------------|--------------------|---------------------------|-----------------------|-----------|
| Percent change approach | Declining          | 29 (56)                   | 23 (44)               | 52 (100)  |
|                         | Persistent hotspot | 16 (73)                   | 6 (27)                | 22 (100)  |
|                         | Total              | 45 (61)                   | 29 (39)               | 74 (100)  |

SUPPLEMENTAL TABLE 3

Correlation between having attained adequate coverage and meeting criteria for adequate response (nonhotspot) as defined by the change in WHO risk categories (approach 3);  $\chi^2 P = 0.431$

|                              |                    | Not adequate (%) | Adequate coverage (%) | Total (%) |
|------------------------------|--------------------|------------------|-----------------------|-----------|
| WHO risk categories approach | Declining          | 32 (58)          | 23 (42)               | 55 (100)  |
|                              | Persistent hotspot | 13 (68)          | 6 (32)                | 19 (100)  |
|                              | Total              | 45 (61)          | 29 (39)               | 74 (100)  |

WHO = World Health Organization.

SUPPLEMENTAL TABLE 4

Correlation between having attained adequate coverage and meeting criteria for adequate response (nonhotspot) as defined by the absolute change in both prevalence and intensity (approach 4);  $\chi^2 P = 0.257$

|                                                                 |                                                                                      | Not adequate (%) | Adequate coverage (%) | Total (%) |
|-----------------------------------------------------------------|--------------------------------------------------------------------------------------|------------------|-----------------------|-----------|
| Absolute prevalence + absolute village-level intensity approach | Prevalence decreased $\geq 30\%$ , intensity decreased $\geq 50$ epg (declining)     | 13 (46)          | 15 (54)               | 28 (100)  |
|                                                                 | Prevalence decreased $\geq 30\%$ , but intensity decreased $< 50$ epg                | 6 (67)           | 3 (33)                | 9 (100)   |
|                                                                 | Prevalence decreased $< 30\%$ , intensity decreased $\geq 50$ epg                    | 6 (75)           | 2 (25)                | 8 (100)   |
|                                                                 | Prevalence decreased $< 30\%$ , intensity decreased $< 50$ epg (persistent hotspots) | 20 (69)          | 9 (31)                | 29 (100)  |
|                                                                 | Total                                                                                | 45 (61)          | 29 (39)               | 74 (100)  |

SUPPLEMENTAL TABLE 5

Correlation between having attained adequate coverage and meeting criteria for adequate response (nonhotspot) as defined by the relative change in both prevalence and intensity (approach 4);  $\chi^2 P = 0.274$

|                                                                   |                                                                                      | Not adequate (%) | Adequate coverage (%) | Total (%) |
|-------------------------------------------------------------------|--------------------------------------------------------------------------------------|------------------|-----------------------|-----------|
| Relative changes in prevalence + village-level intensity approach | Prevalence decreased $\geq 30\%$ , intensity decreased $\geq 50$ epg (declining)     | 23 (52)          | 21 (48)               | 44 (100)  |
|                                                                   | Prevalence decreased $\geq 30\%$ , intensity decreased $< 50$ epg                    | 6 (75)           | 2 (25)                | 8 (100)   |
|                                                                   | Prevalence decreased $< 30\%$ , intensity decreased $\geq 50$ epg                    | 5 (63)           | 3 (37)                | 8 (100)   |
|                                                                   | Prevalence decreased $< 30\%$ , intensity decreased $< 50$ epg (persistent hotspots) | 11 (79)          | 3 (21)                | 14 (100)  |
|                                                                   | Total                                                                                | 45 (61)          | 29 (39)               | 74 (100)  |
